# Supplementary material for: Benchmarking Laser-Induced Fluorescence and Machine Learning for real-time identification of bacteria in bioaerosols
Source: Copernicus journal article supplement (doi:10.5194/egusphere-2025-2484), 2025-08-05

## Supplementary Figures

### Benchmarking Laser-Induced Fluorescence and Machine Learning for real-time identification of bacteria in bioaerosols

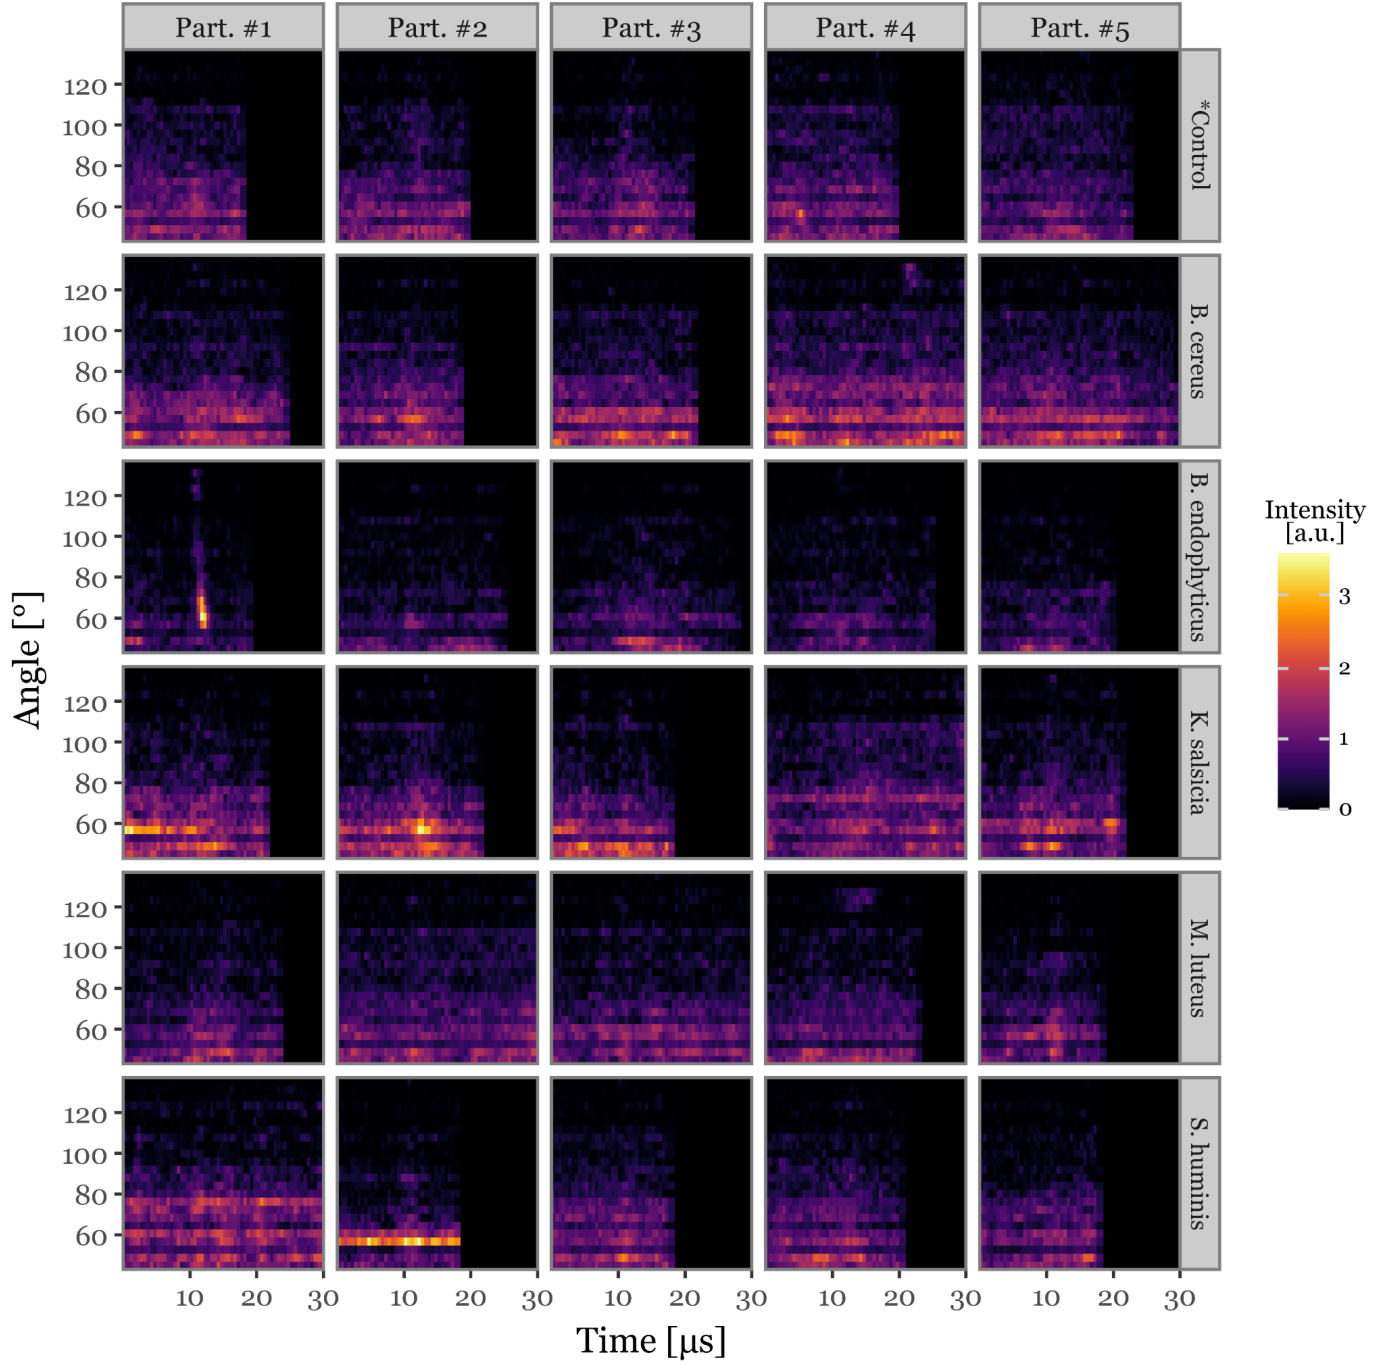

**Suppl. Figure 1.** Example of the scattering images of 5 particles per sample group as they are either cropped or zero padded to 60 acquisitions (30  $\mu$ s time) to be included in the models.

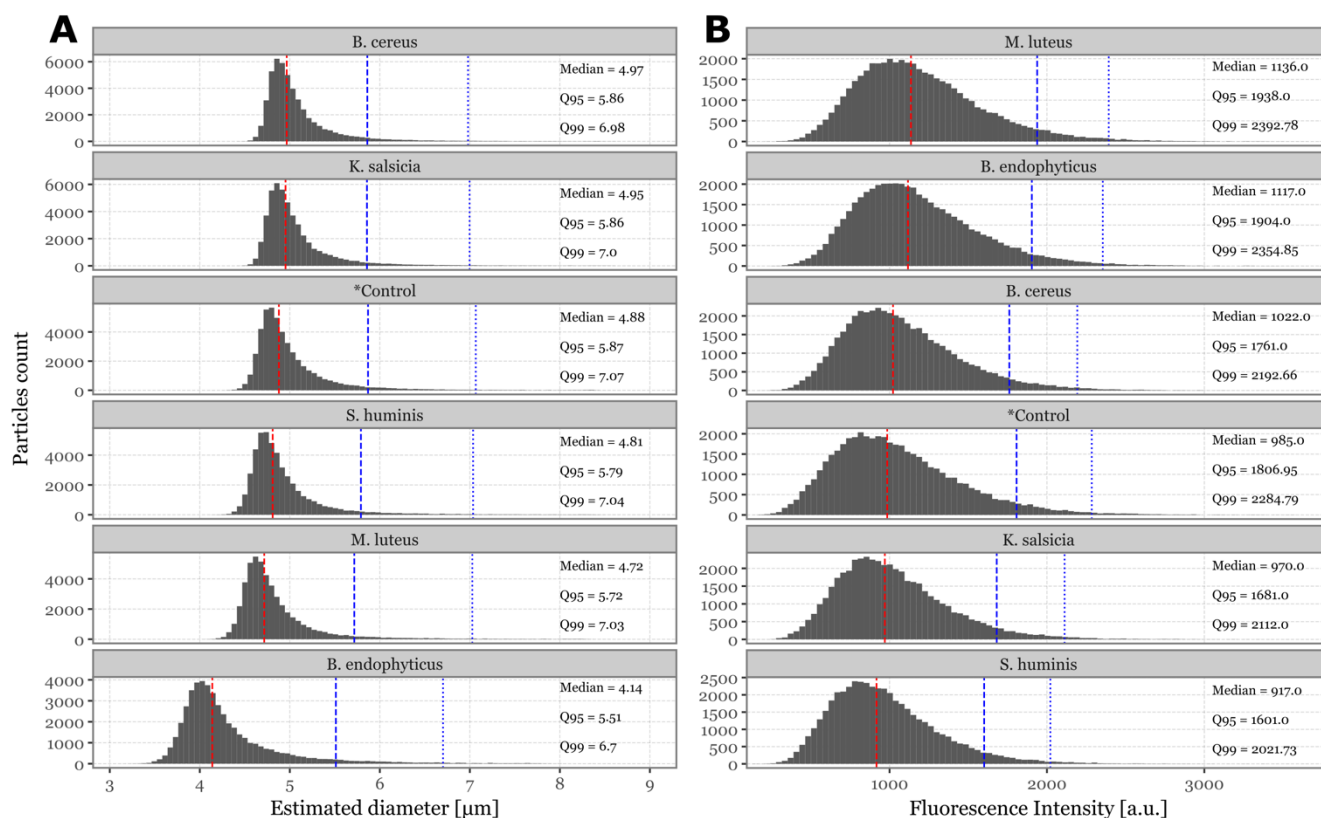

**Suppl. Figure 2. Size and fluorescence intensity distribution for bacterial samples.** Panel A (left) depicts the distributions of estimated diameters per sample group, and panel B (right) depicts the distribution of maximum recorded fluorescence intensities per sample group. Red vertical line indicates the median, with the blue dashed line indicating the 95<sup>th</sup> percentile and the blue dotted line indicating the 99<sup>th</sup> percentile.

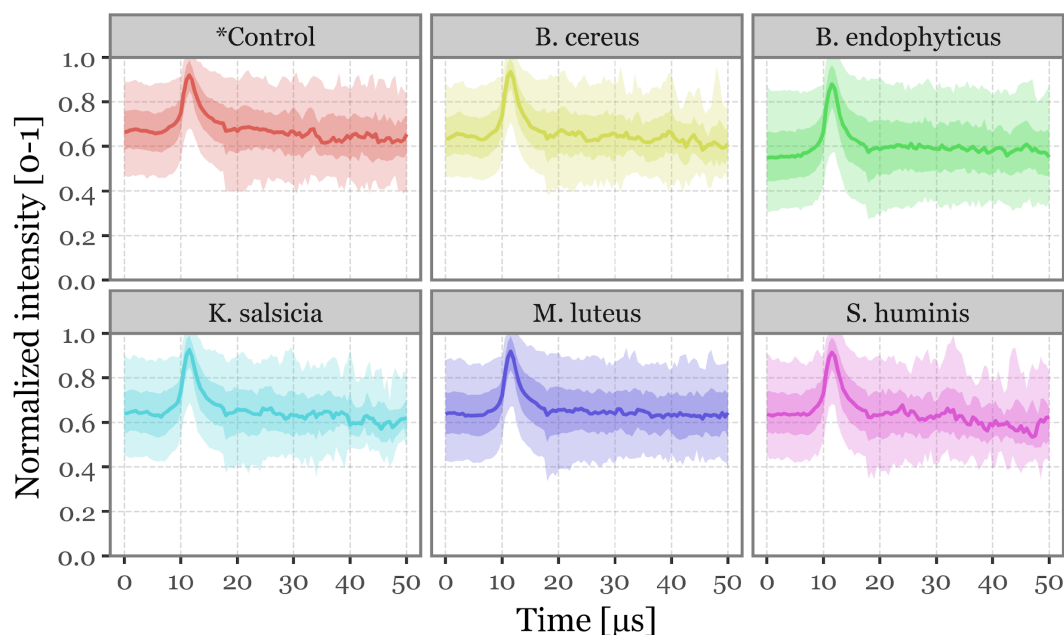

**Suppl. Figure 3.** Distribution of scattering intensity across all angles as a function of acquisition time. The solid line represents the median value for all particles within each group. The darker shaded area indicates the interquartile range (25<sup>th</sup> to 75<sup>th</sup>), while the lighter shaded area represents the 5<sup>th</sup> to 95<sup>th</sup> percentile range.

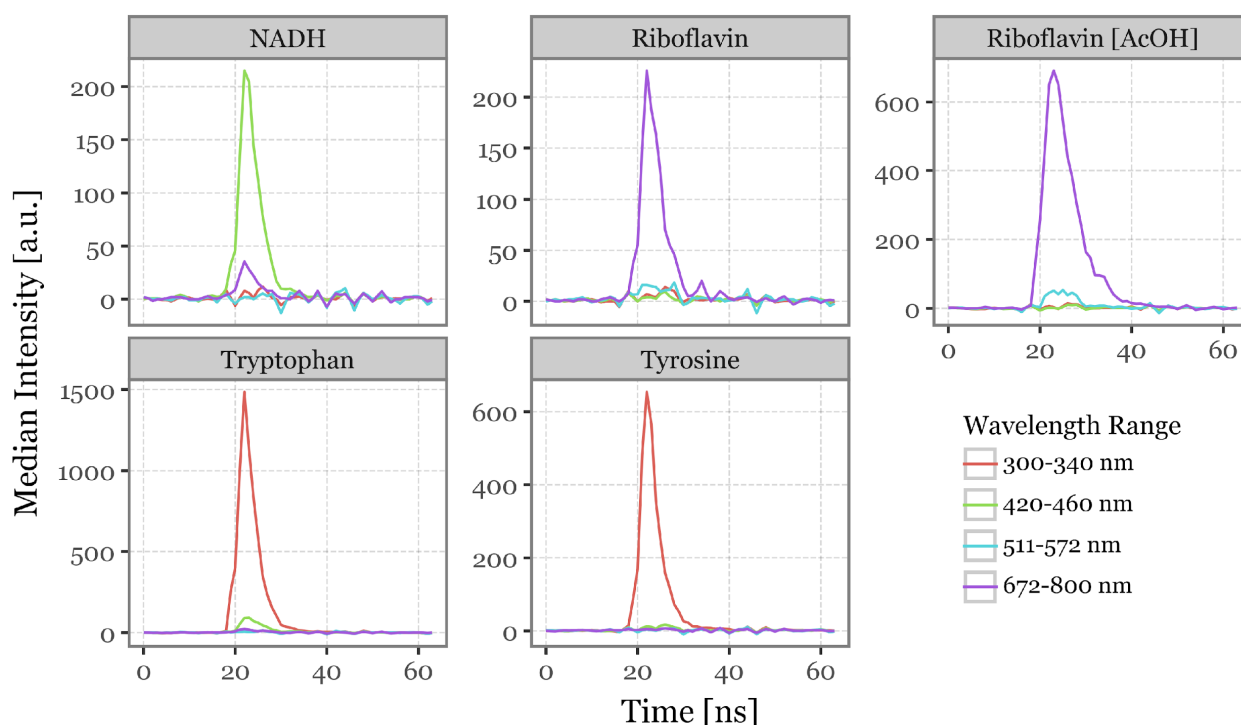

**Suppl. Figure 4. Fluorescence lifetimes for aerosolized fluorophores.** Median fluorescence intensity as a function of time (in ns) for the 4 specified wavelength ranges across the 100 most fluorescent particles for each of the aerosolized fluorophores.

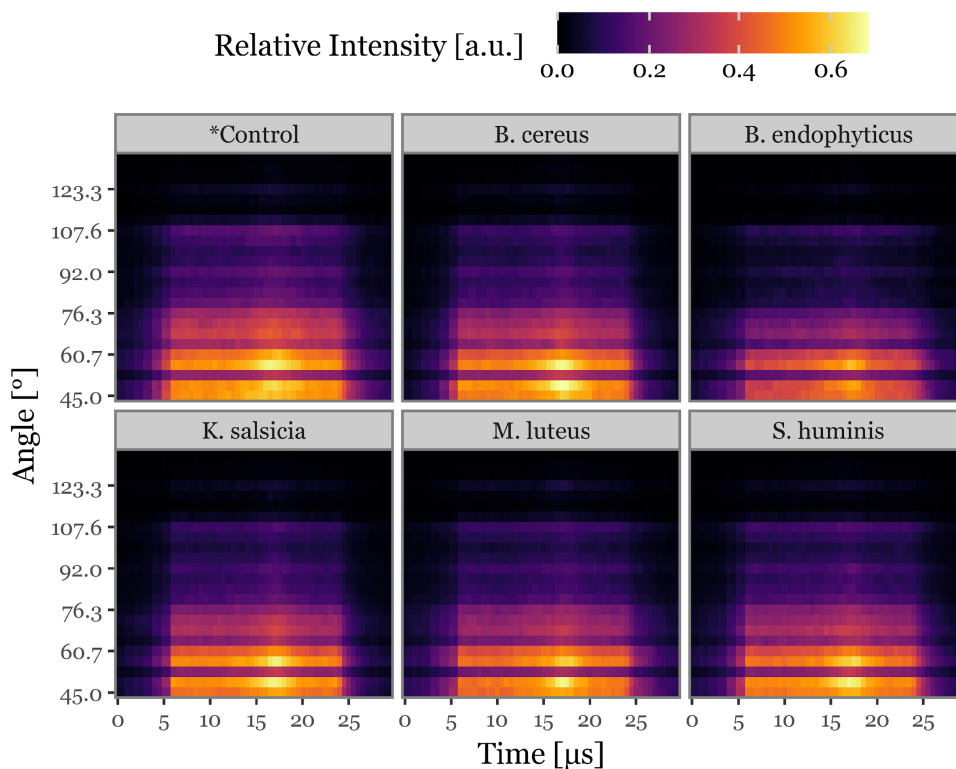

**Suppl. Figure 5. Average scattering images for bacterial aerosols.** Heatmaps depicting the average relative light intensity for each combination of time acquisition (x-axis) and angle (y-axis) and group of aerosolized particles.

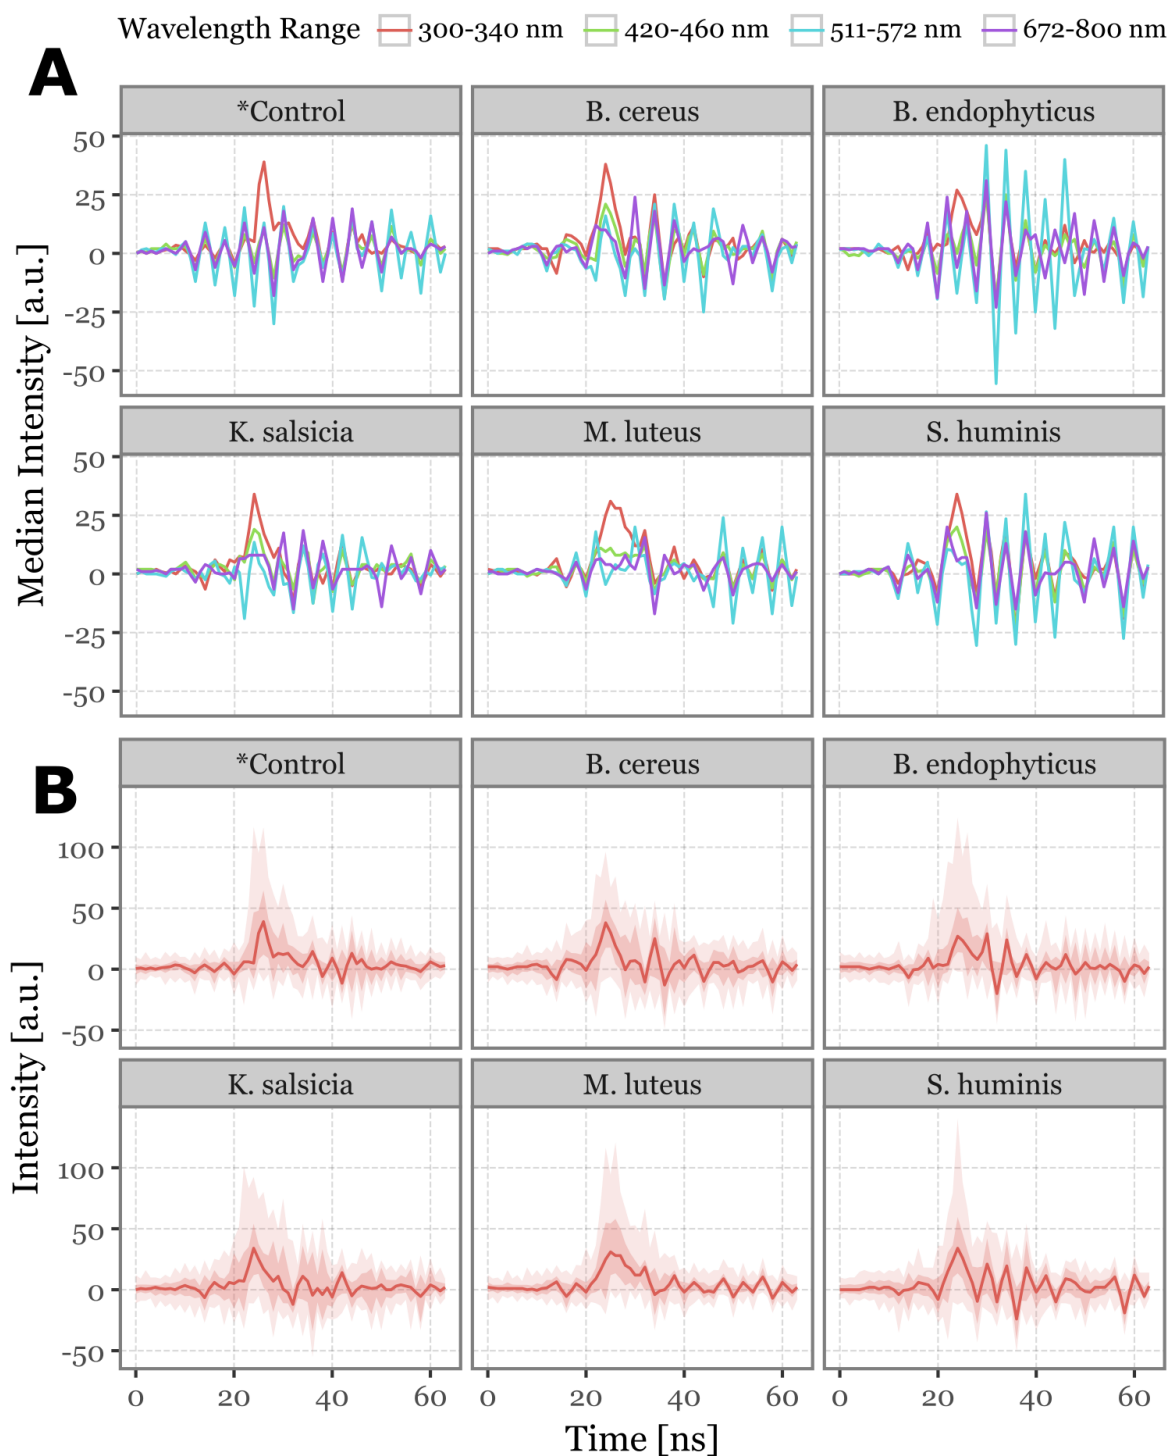

**Suppl. Figure 6. Fluorescence lifetimes for bacterial aerosols.** On panel A (top), the median fluorescence intensity as a function of time (in ns) for the 4 specified wavelength ranges across the 100 most fluorescent particles for each of the bacterial groups. On panel B (bottom), the same but focusing only on the 300-340 nm wavelength range, with the dark shaded area representing the interquartile range (25<sup>th</sup> to 75<sup>th</sup> percentiles) and the lighter shaded area representing the 5<sup>th</sup> to 95<sup>th</sup> percentiles.

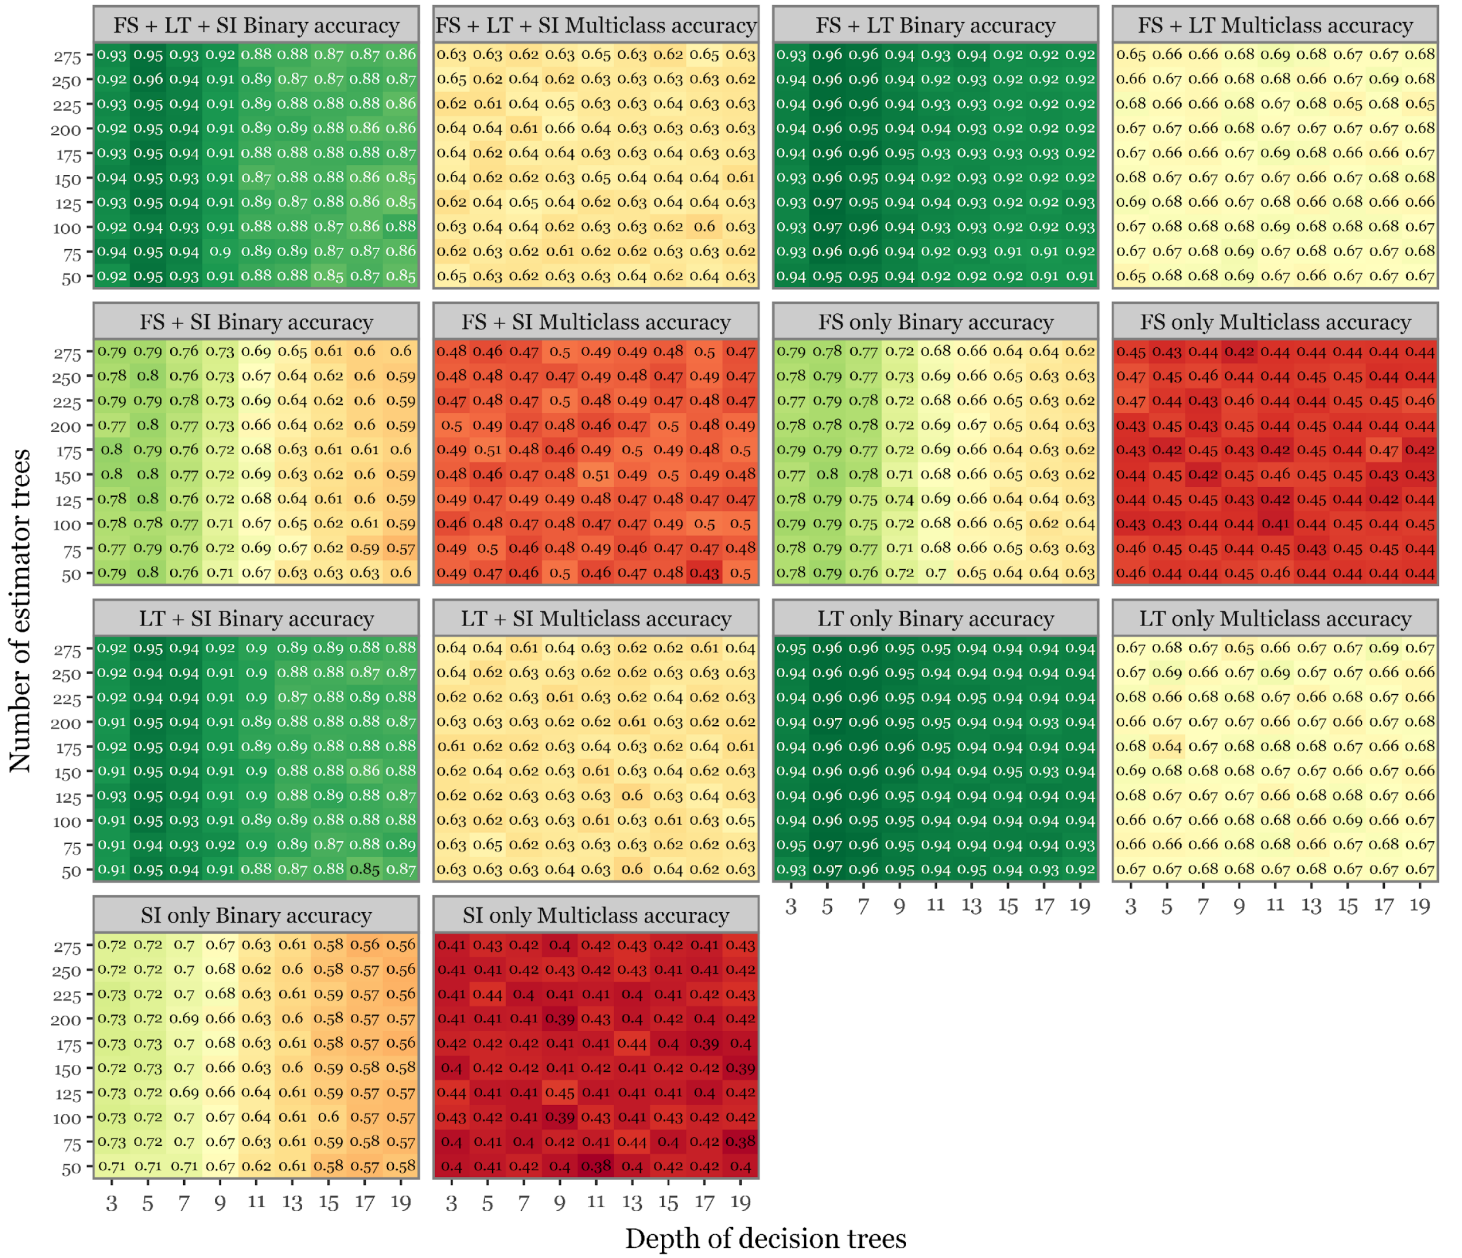

Supplement: Supplementary file 1 [file egusphere-2025-2484-supplement.pdf]
